# Supplementary material for: A new clade of styrene monooxygenases for (R)-selective epoxidation
Source: Royal Society of Chemistry journal article supplement (doi:10.1039/d0cy02312d), 2021-01-01
Supplement: d0cy02312d1.pdf [file d0cy02312d1.pdf]

## *Electronic Supporting Information (ESI)*

### **A new clade of styrene monooxygenases for (*R*)-selective epoxidation**

Hu Xiao,<sup>a,b,d</sup> Shuang Dong,<sup>c</sup> Yan Liu,<sup>a</sup> Xiao-Qiong Pei,<sup>a</sup> Hui Lin<sup>c\*</sup> and Zhong-Liu Wu<sup>a\*</sup>

<sup>a</sup>CAS Key Laboratory of Environmental and Applied Microbiology, Environmental Microbiology Key Laboratory of Sichuan Province, Chengdu Institute of Biology, Chinese Academy of Sciences, Chengdu 610041, China

<sup>b</sup>College of Life Sciences, Sichuan University, No.29 Wangjiang Road, Chengdu 610064, China.

<sup>c</sup>College of Life Sciences, Henan Agricultural University, 95 Wenhua Road, Zhengzhou 450002, China

<sup>d</sup>University of Chinese Academy of Sciences, Beijing 100049, China.

|                                                                                        |    |
|----------------------------------------------------------------------------------------|----|
| General Methods .....                                                                  | 2  |
| Spectral data of epoxide products.....                                                 | 2  |
| Table S1. Primers for plasmid construction .....                                       | 5  |
| Table S2. Primers for site-directed mutagenesis. ....                                  | 6  |
| Table S3. Biotransformation of styrene by <i>AaStyA</i> wild-type and mutants. ....    | 7  |
| Figure S1. Multiple sequence alignment of ( <i>R</i> )-selective SMOs. ....            | 8  |
| Figure S2. Sequence alignment of Groups I to IV SMOs at position 46.....               | 9  |
| Figure S3. SDS-PAGE analysis of <i>SeStyA</i> , <i>AaStyA</i> and <i>PbStyA</i> . .... | 10 |
| Figure S4. Optimizing reaction conditions for kinetic analysis. ....                   | 11 |
| Figure S5. Steady-state kinetics of <i>StyAs</i> in the epoxidation of styrene.....    | 12 |
| <sup>1</sup> H NMR spectra and HPLC chromatograms.....                                 | 13 |

## General Methods

The substrates **1a-13a** were purchased from Alfa-Aesar (Tianjin, China) or Sigma-Aldrich (St. Louis, MO, USA). Racemic oxides (*rac*)-**2b-13b** were synthesized with >95% purity from the corresponding substrates by *m*-chloroperoxybenzoic acid oxidation.<sup>1</sup> Racemic oxides **1b** was purchased from Sigma-Aldrich. Restriction enzymes, High-Fidelity DNA polymerase and T4 DNA ligase were purchased from New England Biolabs (Beijing, China). All other chemicals were purchased from commercial supplies and used without further purification. Gas chromatography (GC) was performed on an Agilent Technologies 7890B GC system connected to an FID detector using a Cyclodex-B column (30m × 0.25mm × 0.25 μm, USA) or CHIRASIL-DEX CB column (Agilent Technologies, USA). High performance liquid chromatography (HPLC) was performed using Shimadzu Prominence LC-20CE system (Shimadzu, Japan) connected to a PDA-detector. <sup>1</sup>H NMR spectra were recorded on a Bruker-600 (600/150 MHz) spectrometer in CDCl<sub>3</sub>.

### Spectral data of epoxide products

**(R)-Styrene epoxide (1b)**: colorless oil; retention time:  $t_R(R)$  11.5 min,  $t_R(S)$  12.7 min (Chiralpak IC-H, *n*-hexane:2-propanol 98: 2, 0.5 mL/min);  $[\alpha]_D^{25} = -20.2$  (48 mM, CHCl<sub>3</sub>)  $\{[\alpha]_D^{25} = +21.1$ , (83 mM, CHCl<sub>3</sub>) for 99% ee, (*S*) $\}^2$ ; <sup>1</sup>H NMR (600 MHz, CDCl<sub>3</sub>):  $\delta$  7.31 (m, 5H), 3.87 (dd, 1H,  $J=2.62$ , 3.96 Hz), 3.15 (dd, 1H,  $J= 3.96$ , 5.52 Hz), 2.81 (dd, 1H,  $J=2.62$ , 5.52 Hz).

**(R)-2-(2-bromophenyl)oxirane (2b)**: colorless oil; retention time:  $t_R(R)$  18.4 min,  $t_R(S)$  20.4 min (Chiralpak AS-H, *n*-hexane: 2-propanol 90: 10, 0.5 mL/min); <sup>1</sup>H NMR (600 MHz, CDCl<sub>3</sub>):  $\delta$  7.54 (m, 1H), 7.24-7.30 (m, 2H), 7.16 (m, 1H), 4.15 (dd, 1H,  $J=2.68$ , 4.46 Hz), 3.19 (dd, 1H,  $J=4.46$ , 5.84 Hz), 2.65 (dd, 1H,  $J=2.68$ , 5.84 Hz).

**(R)-2-(3-bromophenyl)oxirane (3b)**: yellow oil; retention time:  $t_R(R)$  12.3 min,  $t_R(S)$  11.6 min (Chiralpak AD-H, *n*-hexane: 2-propanol 98: 2, 0.5 mL/min); <sup>1</sup>H NMR (600

MHz, CDCl<sub>3</sub>):  $\delta$  7.42 (m, 2H), 7.22 (m, 2H), 3.82 (dd, 1H,  $J= 2.68, 4.00$  Hz), 3.14 (dd, 1H,  $J= 4.00, 5.54$  Hz), 2.75 (dd, 1H,  $J= 2.68, 5.54$  Hz).

**(S)-2-(4-bromophenyl)oxirane (4b)**: colorless oil; retention time:  $t_R(R)$  12.5 min,  $t_R(S)$  13.3 min (Chiralpak AD-H, *n*-hexane: 2-propanol 99: 1, 0.5 mL/min); <sup>1</sup>H NMR (600 MHz, CDCl<sub>3</sub>):  $\delta$  7.47 (d, 2H,  $J= 8.44$  Hz), 7.15 (d, 2H,  $J= 8.44$  Hz), 3.82 (dd, 1H,  $J= 2.34, 4.00$  Hz), 3.14 (dd, 1H,  $J= 4.00, 5.48$  Hz), 2.75 (dd, 1H,  $J= 2.34, 5.48$  Hz).

**(R)-2-(2-Chlorophenyl)oxirane (5b)**: yellow oil; retention time:  $t_R(R)$  9.5 min,  $t_R(S)$  10.0 min (Chiralpak IC-H, *n*-hexane: 2-propanol 99: 1, 0.5 mL/min); <sup>1</sup>H NMR (600 MHz, CDCl<sub>3</sub>):  $\delta$  7.36 (d, 1H,  $J= 7.21$  Hz), 7.24 (m, 3H), 4.21 (dd, 1H,  $J= 2.84, 4.06$  Hz), 3.19 (dd, 1H,  $J= 4.06, 6.00$  Hz), 2.66 (dd, 1H,  $J= 2.84, 6.00$  Hz).

**(R)-2-(3-Chlorophenyl)oxirane (6b)**: yellow oil; retention time:  $t_R(R)$  13.3 min,  $t_R(S)$  12.7 min (Chiralpak AD-H, *n*-hexane: 2-propanol 99: 1, 0.5 mL/min); <sup>1</sup>H NMR (600 MHz, CDCl<sub>3</sub>):  $\delta$  7.27 (m, 3H), 7.17 (m, 1H), 3.83 (dd, 1H,  $J= 2.54, 4.32$  Hz), 3.14 (dd, 1H,  $J= 4.32, 5.56$  Hz), 2.76 (dd, 1H,  $J= 2.54, 5.56$  Hz).

**(S)-2-(4-Chlorophenyl)oxirane (7b)**: yellow oil; retention time:  $t_R(R)$  10.4 min,  $t_R(S)$  11.5 min (Chiralpak AS-H, *n*-hexane: 2-propanol 90: 10, 0.5 mL/min); <sup>1</sup>H NMR (600 MHz, CDCl<sub>3</sub>):  $\delta$  7.32 (d, 2H,  $J= 8.80$  Hz), 7.21 (d, 2H,  $J= 8.80$  Hz), 3.83 (dd, 1H,  $J= 2.70, 3.98$  Hz), 3.14 (dd, 1H,  $J= 3.98, 5.44$  Hz), 2.75 (dd, 1H,  $J= 2.70, 5.44$  Hz).

**(R)-2-(2-tolyl)oxirane (8b)**: colorless oil; retention time:  $t_R(R)$  21.5 min,  $t_R(S)$  22.0 min (Chiral GC, CHIRASIL-DEX CB column); <sup>1</sup>H NMR (400 MHz, CDCl<sub>3</sub>):  $\delta$  7.20 (m, 3H), 7.17 (m, 1H), 4.01 (dd, 1H,  $J= 2.78, 4.04$  Hz), 3.17 (dd, 1H,  $J= 4.04, 5.78$  Hz), 2.70 (dd, 1H,  $J= 2.78, 5.78$  Hz), 2.43 (s, 3H).

**(R)-2-(3-tolyl)oxirane (9b)**: colorless oil; retention time:  $t_{R1}(R)$  5.5 min,  $t_{R1}(S)$  6.0 min (Chiralpak AS-H, *n*-hexane: 2-propanol 99: 1, 1 mL/min);  $t_{R2}(R)$  20.6 min,  $t_{R2}(S)$  21.0

min (Chiral GC, CHIRASIL-DEX CB column);  $^1\text{H}$  NMR (400 MHz,  $\text{CDCl}_3$ ):  $\delta$  7.23 (d, 1H,  $J=7.80$  Hz), 7.10 (m, 3H), 3.84 (dd, 1H,  $J=2.64, 4.10$  Hz), 3.14 (dd, 1H,  $J=4.10, 5.60$  Hz), 2.80 (dd, 1H,  $J=2.64, 5.60$  Hz), 2.35 (s, 3H).

**(S)-2-(4-tolyl)oxirane (10b)**: colorless oil, (retention time:  $t_{\text{R}}(R)$  5.5 min,  $t_{\text{R}}(S)$  5.7 min, AS-H, *n*-Hexane: 2-propanol = 90: 10, 1 mL/min),  $^1\text{H}$  NMR (400 MHz,  $\text{CDCl}_3$ ):  $\delta$  7.23 (m, 2H), 7.13 (m, 2H), 3.83 (dd, 1H,  $J= 2.48, 4.04$  Hz), 3.13 (dd, 1H,  $J= 4.04, 5.64$  Hz), 2.80 (dd, 1H,  $J= 2.48, 5.64$  Hz), 2.35 (s, 3H).

**(R)-2-(3-methoxyphenyl)oxirane (11b)**: colorless oil; retention time:  $t_{\text{R}1}(R)$  10.1 min,  $t_{\text{R}1}(S)$  10.4 min (Chiralpak AS-H, *n*-hexane: 2-propanol 99: 1, 1 mL/min);  $t_{\text{R}2}(R)$  26.8 min,  $t_{\text{R}2}(S)$  27.0 min (Chiral GC, CHIRASIL-DEX CB column);  $^1\text{H}$  NMR (400 MHz,  $\text{CDCl}_3$ ):  $\delta$  7.26 (dd, 1H,  $J=4.04, 5.78$  Hz), 6.86 (m, 3H), 3.85 (dd, 1H,  $J=2.84, 4.02$  Hz), 3.81 (s, 3H), 3.14 (dd, 1H,  $J=4.02, 5.56$  Hz), 2.79 (dd, 1H,  $J=2.84, 5.56$  Hz).

**(1R,2S)-1,2-dihydronaphthalene oxide(13b)**: white solid; retention time:  $t_{\text{R}}(1R,2S)$  10.9 min,  $t_{\text{R}}(1S,2R)$  11.9 min (Chiralpak AS-H, *n*-hexane: 2-propanol 90: 10, 0.5 mL/min);  $^1\text{H}$  NMR (600 MHz,  $\text{CDCl}_3$ ):  $\delta$  7.54 (d, 1H,  $J= 7.62$  Hz), 7.21 (m, 2H), 7.09 (d, 1H,  $J= 7.32$  Hz), 4.58 (d, 1H,  $J= 8.38$  Hz), 3.81 (m, 1H), 2.91 (m, 1H), 2.14 (m, 1H), 1.85 (m, 1H), 1.26(m, 1H).

**Table S1. Primers for plasmid construction**

| Accession No. of targeted protein | Nucleotide sequence                                                          |
|-----------------------------------|------------------------------------------------------------------------------|
| WP_030605949.1                    | 5'-TAATTACATATGAGCATCGGCGTCGTC-3'<br>5'-TATACTAGTTCAGCCGGCCGGTGC-3'          |
| WP_112440363.1                    | 5'-TAATTACATATGAGCCGCGTGGGTGT-3'<br>5'-TATACTAGTTCAGCCGTGCGGTGC-3'           |
| WP_052286622.1                    | 5'-TAATTACATATGACGAGCGTCGGC-3'<br>5'-TATACTAGTTCAGCCCTGCCGTGG-3'             |
| WP_113694022.1                    | 5'-TAATTACATATGACCGGCATCGGCGT-3'<br>5'-TATACTAGTTCAATCGGTTTTGCCGGC-3'        |
| WP_137992763.1                    | 5'-TAATTACATATGACCGACACCGGCA-3'<br>5'-TATACTAGTTCATCCATGCGCCACGT-3'          |
| WP_069162359.1                    | 5'-TAATTACATATGAGCAGTATTGGCATTG-3'<br>5'-TATACTAGTTCACTCCGTACGGAAGC-3'       |
| WP_067993035.1                    | 5'-TAATTACATATGACCAGCATCGGCAT-3'<br>5'-TATACTAGTTCACTCCGCACGGAAG-3'          |
| WP_067452867.1                    | 5'-TAATTACATATGACCACCATCGGC-3'<br>5'-TATACTAGTTCACTCCTCAATGGATTTCAG-3'       |
| WP_043716969.1                    | 5'-TAATTACATATGACCGACATCGGCGTC-3'<br>5'-TATACTAGTTCAGCCACCGGCGACG-3'         |
| WP_120086312.1                    | 5'-TAATTACATATGGCCGATATCGGC-3'<br>5'-TATACTAGTCTAGACCCTG AATCCGGC-3'         |
| WP_120086314.1                    | 5'-TAATTACATATGGGAGGAATAGGCATTC-3'<br>5'-TATACTAGTTTAAACGGTATTCAGACAGGAAC-3' |
| WP_067345360.1                    | 5'-TAATTACATATGACCAGCGTGGGC-3'<br>5'-TATACTAGTTTAAACGTTGACGCGGACC-3'         |
| WP_073449381.1                    | 5'-TAATTACATATGACCAGCGTGGGC-3'<br>5'-TATACTAGTTTAAACCTTGACGCGGACC-3'         |
| WP_102925532.1                    | 5'-TAATTACATATGACCAGCGTGGGC-3'<br>5'-TATACTAGTTTAAACCTTGACGCGGACC-3'         |
| WP_121802755.1                    | 5'-TAATTACATATGCGTATCGGTATTATGG-3'<br>5'-TATACTAGTTTAGGTTTGACCACGG-3'        |
| WP_051753842.1                    | 5'-TAATTACATATGAGCATCGGTATTGTT-3'<br>5'-TATACTAGTTTAAACCGCGCTACG-3'          |
| WP_102918856.1                    | 5'-TAATTACATATGCGTATCGCGATCATTG-3'<br>5'-TATACTAGTTTAGCTCGGACGCGCG-3'        |
| WP_067345356.1                    | 5'-TAATTACATATGAGCATCGGCATTGTTG-3'<br>5'-TATACTAGTTTAAACACCGCTACGCACC-3'     |
| WP_073449384.1                    | 5'-TAATTACATATGAGCATGGGCATCGTT-3'<br>5'-TATACTAGTTTAAACACCGCTACGCACC-3'      |
| WP_125743710.1                    | 5'-TAATTACATATGAGCGATATCGCGATTG-3'<br>5'-TATACTAGTTTAAACCCGCCTCGGTGAT-3'     |
| WP_141293187.1                    | 5'-TAATTACATATGAGCGACATCGCGATTG-3'<br>5'-TATACTAGTTTAAACCCGCCTCGGTGAT-3'     |

**Table S2. Primers for site-directed mutagenesis.**

| Mutant                | Nucleotide sequence                                                                     |
|-----------------------|-----------------------------------------------------------------------------------------|
| <i>AaStyA</i><br>F46T | 5'-CGGCCGCGGAACACCCCGGCGCGGTTC-3'<br>5'-GAACCGCGCCGGGGTGTTCGCGGCCG-3'                   |
| <i>PbStyA</i><br>F46T | 5'-GTGGGCCACGCAACACCCCGGTCCGATTCGG-3'<br>5'-CCGAATCGGACCGGGGTGTTGCGTGGCCCCAC-3'         |
| <i>SeStyA</i> F56T    | 5'-CGGCCGCGGAACACCCCGCCCGGTTC-3'<br>5'-GAACCGGGCGGGGGTGTTCGCGGCCG-3'                    |
| <i>PsStyA</i> T47F    | 5'-GCCTTCGGCTGCTGAACTTTGTGGCTCATCACGCGG-3'<br>5'-CCGCGTGATGAGCCACAAGTTCAGCAGCCGAAGGC-3' |
| <i>AaStyA</i><br>F46H | 5'-CGGCCGCGGAACCATCCGGCGCGGTTCG-3'<br>5'-CGAACCGCGCCGGATGGTTCCGCGGCCG-3'                |
| <i>AaStyA</i><br>F46R | 5'-CGGCCGCGGAACCGTCCGGCGCGGTTC-3'<br>5'-GAACCGCGCCGGACGGTTCGCGGCCG-3'                   |
| <i>AaStyA</i><br>F46K | 5'-GCGGCCGCGGAACAAACCGGCGCGGTTCG-3'<br>5'-CGAACCGCGCCGGTTTGTTCGCGGCCG-3'                |
| <i>AaStyA</i> F46I    | 5'-GCGGCCGCGGAACATTCCGGCGCGGTTCG-3'<br>5'-CGAACCGCGCCGGAATGTTCCGCGGCCG-3'               |
| <i>AaStyA</i><br>F46L | 5'-CGGCCGCGGAACCTGCCGGCGCGGTTC-3'<br>5'-GAACCGCGCCGGCAGGTTCCGCGGCCG-3'                  |
| <i>AaStyA</i><br>F46W | 5'-GCCGCGGAACCTGGCCGGCGCGGTTC-3'<br>5'-GAACCGCGCCGGCCAGTTCGCGGC-3'                      |
| <i>AaStyA</i><br>F46A | 5'-GGCCGCGGAACGCGCCGGCGCGGTTC-3'<br>5'-GAACCGCGCCGGCGCGTTCGCGGCC-3'                     |
| <i>AaStyA</i><br>F46M | 5'-CGGCCGCGGAACATGCCGGCGCGGTTCG-3'<br>5'-CGAACCGCGCCGGCATGTTCCGCGGCCG-3'                |
| <i>AaStyA</i> F46P    | 5'-GGCCGCGGAACCCGCCGGCGCGGTTC-3'<br>5'-GAACCGCGCCGGCGGGTTCGCGGCC-3'                     |
| <i>AaStyA</i><br>F46C | 5'-GGCCGCGGAACCTGCCGGCGCGGTTC-3'<br>5'-GAACCGCGCCGGGCAGTTCGCGGCC-3'                     |
| <i>AaStyA</i><br>F46N | 5'-GCGGCCGCGGAACAATCCGGCGCGGTTCG-3'<br>5'-CGAACCGCGCCGGATTGTTCCGCGGCCG-3'               |
| <i>AaStyA</i><br>F46V | 5'-CGGCCGCGGAACGTGCCGGCGCGGTTC-3'<br>5'-GAACCGCGCCGGCACGTTCCGCGGCCG-3'                  |
| <i>AaStyA</i><br>F46G | 5'-CGGCCGCGGAACGGCCCGGCGCGGTTC-3'<br>5'-GAACCGCGCCGGGCCGTTCCGCGGCCG-3'                  |
| <i>AaStyA</i> F46S    | 5'-CGGCCGCGGAACAGCCCGGCGCGGTTC-3'<br>5'-GAACCGCGCCGGGCTGTTCGCGGCCG-3'                   |
| <i>AaStyA</i><br>F46Q | 5'-CGGCCGCGGAACAGCCGGCGCGGTTC-3'<br>5'-GAACCGCGCCGGCTGGTTCGCGGCCG-3'                    |
| <i>AaStyA</i><br>F46Y | 5'-CGGCCGCGGAACATCCGGCGCGGTTC-3'<br>5'-GAACCGCGCCGGATAGTTCGCGGCCG-3'                    |
| <i>AaStyA</i><br>F46D | 5'-CGGCCGCGGAACGATCCGGCGCGGTTCG-3'<br>5'-CGAACCGCGCCGGATCGTTCGCGGCCG-3'                 |
| <i>AaStyA</i><br>F46E | 5'-CGGCCGCGGAACGAACCGGCGCGGTTCG-3'<br>5'-CGAACCGCGCCGGTTCGTTCCGCGGCCG-3'                |

**Table S3. Biotransformation of styrene by wild-type *AaStyA* and mutants.**

| Enzyme    | Yield (%) | ee (%)         |
|-----------|-----------|----------------|
| wild type | 66%       | 94( <i>R</i> ) |
| F46E      | 0         | --             |
| F46G      | 2         | 78( <i>R</i> ) |
| F46H      | 33        | 65( <i>S</i> ) |
| F46I      | 17        | 88( <i>R</i> ) |
| F46K      | 0         | --             |
| F46L      | 32        | 84( <i>R</i> ) |
| F46M      | 31        | 86( <i>R</i> ) |
| F46P      | 39        | 5( <i>S</i> )  |
| F46R      | 0         | --             |
| F46W      | 18        | 71( <i>R</i> ) |
| F46S      | 18        | 58( <i>R</i> ) |
| F46C      | 37        | 36( <i>R</i> ) |
| F46D      | 0         | --             |
| F46Y      | 39        | 47( <i>R</i> ) |
| F46A      | 21        | 54( <i>R</i> ) |
| F46N      | 22        | 23( <i>S</i> ) |
| F46T      | 32        | 22( <i>S</i> ) |
| F46Q      | 3         | 82( <i>R</i> ) |
| F46V      | 34        | 24( <i>R</i> ) |

```

                                GXGXXG                                F
StStyA      : MSVGVIGSGISGLALRLRQQLGVPVTVYSEHDIDGLTGRPRNFHARHGFTQQCRRE  CVFEDDFALAQ : 70
AaStyA      : TGIQVIGAGIAGLHLALRLRQQLGVPVTVYSAQTTPGELATARPRNFHARHGFTQQCRRE  CVFAMESDDAR : 70
SeStyA      : TIIGIIGSGISGLALRLRQQLGVPVTVYSAQTAEELGASRPRNFHARHAPTQCRREDS  CVFHAMQDFDAR : 70
PbStyA      : AIIGILGAGISGLALRLRQQLGVPVTVYTPDQSEQLAAGCPNRFVRRGFTVQRREEL  CVFELMPSAQ : 70
S.achromogenes WP_030605949.1 : MSIGVVSGISGLALRLRQQLGVPVTVYSEHDIDGLTGRPRNFHARHGFTQQCRRE  CVFEDDFALAQ : 70
Streptomyces sp. 769 WP_052286622.1 : TSVGIIGSGISGLALRLRQQLGTAATVYSTQDIDQLKSGRPRNFHARHAPTQCRRE  CVFSADEFDPAQ : 70
N.altamirensis WP_069162359.1 : SSIGIVGTGISGLALRLRQQLGTDVTVYSAQDPDQLASGRPRNFHARHGFTQQCRRE  CVFEDDFALAQ : 70
Nocardia_alba WP_067452867.1 : TTIGIVGTGISGLALRLRQQLGIEVVVYSAQELDQLATGRPRNFHARHGFTQQCRRE  CVFEDDFALAQ : 70
Kutzneria_sp._744 WP_043716969.1 : TLIGVIGAGISGLALRLRQQLGVPVTVYSTQTPDELAAAMRPRNFHARHGFTQQCRRE  CVFEDDFALAQ : 70
                                *
                                GG                                DXXXXX
StStyA      : VRHWAVTAHAALAGRHEFVAGLTPPSSVVDFFRYLLELSAVVDRGGQLVTGDHAVEDLA  HDLHVVVA : 140
AaStyA      : VRSWSITING--GGLLEFAAALTPSSVVDFFRYLLELFEFVNRGGQVMIGAVTAADV  AGRHDLHVVVA : 138
SeStyA      : VHSWAIITHG--EGADLEFAAALTPSSVVDFFRYLLELFEFARGGQVNRIGPVVD  EVARRHDLHVVVA : 138
PbStyA      : VAVVAANIIFPP--GQDPLYLSTRIDPPANGVDFRVYLLIARHAEERGKVIIT---  ELLPSGHDLHVVVA : 135
S.achromogenes WP_030605949.1 : VRHWAVTAHPGEGEPPRFLAALTPPSSVVDFFRYLLELSAVVDRGGQLITG  GHAFELITGRHDLHVVVA : 140
Streptomyces sp. 769 WP_052286622.1 : VHHWSTLVHT--DGFAIAFFARHAPSSVVDFFRYLLELHLLGEEVARGGLD  VGEFAVEDIARRHDLHVVVA : 138
N.altamirensis WP_069162359.1 : VHRWDVAIQA--GPQETFFHADTPPSSVVDFFRYLLELCAKGVARGGQV  VVGERPITIAERHDLHVVVA : 138
Nocardia_alba WP_067452867.1 : VRRWDVTVGA--GDHTAIFHGBLTPPSSVVDFFRYLLELCAKHAERG  CKVVVGARPIITVAEQHDLHVVVA : 138
Kutzneria_sp._744 WP_043716969.1 : VHSWSITMHG--DDRDLEFSAAALTPSSVVDFFRYLLELFEFVNRGG  NAVILAVTFHQVAARHDLHVVVA : 138
                                *
                                XG
StStyA      : NGRSRVRLFFHADPPRSYPTTPQRFVLCAGIYHGITTEVPHSLDTHL  FBGAGEILRLFFFSFACRADVLAF : 210
AaStyA      : NGRSRLREFFVDFARSPHHTPQRFVLCGEGYHGIVDVEHSLDTHL  FBGAGEILRLFFFSRIGFAHVLAF : 208
SeStyA      : NGRSRLREFFVDFARSPHHTPQRFVLCGEGYHGIVDVEHSLDTHL  FBGAGEILRLFFFSRIGFAHVLAF : 208
PbStyA      : NGRSRVRLFFHADPPRSYPTTPQRFVLCGEGYHGIVDVEHSLDTHL  FBGAGEILRLFFFSFACRADVLAF : 210
S.achromogenes WP_030605949.1 : NGRSRVRLFFHADPPRSYPTTPQRFVLCAGIYHGITTEVPHSLDTHL  FBGAGEILRLFFFSFACRADVLAF : 210
Streptomyces sp. 769 WP_052286622.1 : NGRSRLREFFVDFARSPHHTPQRFVLCGEGYHGIVDVEHSLDTHL  FBGAGEILRLFFFSRIGFAHVLAF : 208
N.altamirensis WP_069162359.1 : NGRSRLREFFVDFARSPHHTPQRFVLCGEGYHGIVDVEHSLDTHL  FBGAGEILRLFFFSRIGFAHVLAF : 208
Nocardia_alba WP_067452867.1 : NGRSRLREFFVDFARSPHHTPQRFVLCGEGYHGIVDVEHSLDTHL  FBGAGEILRLFFFSRIGFAHVLAF : 208
Kutzneria_sp._744 WP_043716969.1 : NGRSRLREFFVDFARSPHHTPQRFVLCGEGYHGIVDVEHSLDTHL  FBGAGEILRLFFFSRIGFAHVLAF : 208
                                *
StStyA      : EAVPGGPLEFAVAHVLAALADAGLFRROVLDLVAAYAEFLRERV  DTCATHTCGGELAQCAITFVVRGQWAR : 280
AaStyA      : EAVPGGPLEFAHLLAALADAGLFRREVRLVAEHAFLRERIDT  TRFDLVAPGELAQGVVTFVVRGQWAR : 278
SeStyA      : EAVPGGPLEFAHLLAALADAGLFRREVRLVAAYAEFLRERV  DTCATHTCGGELAQGVVTFVVRGQWAR : 278
PbStyA      : EAVPGGPLEVLTFRFVADDSGLRLDLYKLAHYAEFLRERIT  TAFELIAPGELAQGVVTFVVRGQWAR : 275
S.achromogenes WP_030605949.1 : EAVPGGPLEAVCHVLAALADAGLFRROVLDLVAAYAEFLRERV  DTCATHTCGGELAQCAITFVVRGQWAR : 280
Streptomyces sp. 769 WP_052286622.1 : EAVPGGPLEVSHLADVDVGGABHRAVDLVAIYAEFLRERID  TGFELISPGVVAQCAITFVVRGQWAR : 278
N.altamirensis WP_069162359.1 : EAVPGGPLEAISHVLEADLEAAYRVDVYKLLGEFAFLRER  IDTCAFTIICPGVVAQCAITFVVRGQWAR : 278
Nocardia_alba WP_067452867.1 : EAVPGGPLEPISRVDFAVEVRYRDNVALLGEFAFLRERV  DQCFETIICPGELAQGVVTFVVRGQWAR : 278
Kutzneria_sp._744 WP_043716969.1 : EAVPGSPLERFAHLLAALADAGLFRSEMLLVAQHAFLRERV  DITREGLIAPGELAQCAITFVVRGQWAR : 278
                                *
                                GDXXXXXXP    GXNXXXXXXXXL
StStyA      : LDDGTCALAIICLAWITNDPLTAQCANLGSHTAHALADLIT  LAEGPFDEAFGRASARLWEHARVVEWNS : 350
AaStyA      : LDDGTCALAIICLAWITNDPLTAQCANLGSHTAHALADLIT  LAASANGPLLAGFGRASARLWEHARVVEWNS : 348
SeStyA      : LDDGTCALAIICLAWITNDPLTAQCANLGSHTAHALADLIT  ASATGPLDDAFGRDLASARLWEHARVVEWNS : 348
PbStyA      : LDDGTCALAIICLAWITNDPLTAQCANLGSHTAHALADLIT  ARRISEQLWEHARVVEWNS : 340
S.achromogenes WP_030605949.1 : LDDGTCALAIICLAWITNDPLTAQCANLGSHTAHALADLIT  ADTRAPYDEAFGRASARLWEHARVVEWNS : 350
Streptomyces sp. 769 WP_052286622.1 : LDDGTCALAIICLAWITNDPLTAQCANLGSHTAHALADLIT  STARGPYDEEFGRSASALWEHARVVEWNS : 348
N.altamirensis WP_069162359.1 : LDDGTCALAIICLAWITNDPLTAQCANLGSHTAHALADLIT  AKASGPDYDQCFRETSQCLWAHARVVEWNS : 348
Nocardia_alba WP_067452867.1 : LDDGTCALAIICLAWITNDPLTAQCANLGSHTAHALADLIT  VTAGGYDETFGRASARLWEHARVVEWNS : 348
Kutzneria_sp._744 WP_043716969.1 : LDDGTCALAIICLAWITNDPLTAQCANLGSHTAHALADLIT  AAAGPLARFCRLASDRLWEHARVVEWNS : 348
                                *
StStyA      : AFLAPPPHVAQIFGFAAEKRTALAFVSRNDPVMAMRTISS  PEGVAAFVADCEGG----- : 407
AaStyA      : AFLAPPPHVVLEIFGFAAEKRTALAFVSRNDPVMAMRTISS  PEGVIAFVQSCDT----- : 404
SeStyA      : AFLAPPPHVMPIFGFAAGKRTALAFVSRNDPVMAMRTISS  PEGVDSFVRSCT----- : 403
PbStyA      : TYLGMPPRHGCVFFFAAGKRTALAFVSRNDPVMAMRTISS  PADSVDFTAGFR----- : 395
S.achromogenes WP_030605949.1 : AFLQPPPHVACILGFAAEKRTALAFVSRNDPVMAMRTISS  PEGVAAFVADCE----- : 405
Streptomyces sp. 769 WP_052286622.1 : AFLLAFAHVTALFAAARARRVALAFVSRNDPVMAMRTISS  EGVASFVAACRPIGPRQG : 410
N.altamirensis WP_069162359.1 : AFLGPPPHVVICIFGFAAEKRTALAFVSRNDPVMAMRTISS  PGGTESFTAGFR----- : 403
Nocardia_alba WP_067452867.1 : AFLGFAAHTTALFAAARARRVALAFVSRNDPVMAMRTISS  PGTAFVAESI----- : 403
Kutzneria_sp._744 WP_043716969.1 : AFLAPPPHVTDFGFAAEKRTALAFVSRNDPVMAMRTISS  PDGAASFVERCV----- : 403

```

**Figure S1. Multiple sequence alignment of (R)-selective SMOs.**

Conserved domains are shown on top of the sequences, including the FAD-binding motifs GxGxxG, GG, and Dx6G, the putative dual function motif GDx6P related to FAD and/or NAD(P)H interaction, and the conserved GxNx8L motif.<sup>3, 4</sup>



|                                            |              |                    |
|--------------------------------------------|--------------|--------------------|
|                                            | T            |                    |
| G.polyisoprenivorans_NBRC16320_GAB22407.1  | : TCIIVGAGT  | AGLHGLHLLIQCGVTTT  |
| G.rubripertincta_ASR05591.1                | : TAIIVGAGT  | AGLHGLHLLIQGHVEST  |
| Rhodococcus_opacus_ANS32444.1              | : TAIIVGAGT  | AGLHGLHLLNEKGILAT  |
| Rhodococcus_sp._ST-10_BAL04129.1           | : TAIIVGAGT  | AGLHGLHLLIQGHVEST  |
| Rhodococcus_sp._ST-5_BAL04132.1            | : TAIIVGAGT  | AGLHGLHLLNEKGILAT  |
| S.fribergensis_WP_039579272.1              | : TCIIVGAGT  | AGLHGLHLLKNGVEVRL  |
| Nevskia_amosa_WP_022977994.1               | : TCIIVGAGT  | AGLHGLHLLIQGHVEST  |
| P.agarilytica_NO2_GAC06215.1               | : TAIIVGAGT  | AGLHGLHLLYRKHNDVTL |
| P.fluorescens_CAB06823.1                   | : TCIIVGAGT  | AGLHGLHLLRQHDVDVT  |
| Pseudomonas_putida_ABX24519.1              | : TCIIVGAGT  | AGLHGLHLLRQHDVDVT  |
| Pseudomonas_sp._LQ26_ADE62390.1            | : TCIIVGAGT  | AGLHGLHLLRQHDVDVT  |
| Pseudomonas_sp._VLB120_AAC23718.1          | : TCIIVGAGT  | AGLHGLHLLRQHDVDVT  |
| uncultured bacterium_ABV24041.1            | : TCIIVGAGT  | AGLHGLHLLYRKHNDVTL |
| M.litorale_WP_027855270.1                  | : TCIIVGAGT  | AGLHGLHLLRQHDVDVT  |
|                                            |              | S                  |
| Gemmobacter_nectarophilus_WP_028028710.1   | : FTIIVGCGS  | GLHVAIGL           |
| Burkholderia_sp._H160_EEA04565.1           | : TAIIVGCGS  | GLHVAIGLDRYVVT     |
| Delftia_acidovorans_SPH-1_ABX34433.1       | : TAIIVGCGS  | GLHVAIGLAAAGHVT    |
| Cupriavidus_necator_H16_CAJ94554.1         | : TAIIVGCGS  | GLHVAIGLCAAGYVVT   |
| Acinetobacter_baylyi_ADP1_CAG69430.1       | : TAIIVGCGS  | GLHVAIGLGLSLLDT    |
| Paenarthrobacter_aurescens_TC1_AEM07034.1  | : ITIIVGCGS  | GLHVAIGLGLLQAGYV   |
| Nocardia_farcinica_IFM_10152_EAD56093.1    | : ITIIVGCGS  | GLHVAIGLGLFGLA     |
| Rhodococcus_opacus_ACR43973.1              | : ITIIVGCGS  | GLHVAIGLGLAIGL     |
| Streptomyces_auratus_AGR0001_EJJ03822.1    | : ITIIVGCGS  | GLHVAIGLGLGIDH     |
| Variovorax_paradoxus_EPS_ADU39062.1        | : VAIIVGCGS  | EMLALGIRAGHVT      |
|                                            |              | L                  |
| Streptomyces_sp._WAC01280_WP_125743710.1   | : TAIIVGAGIS | LHLALRLOQAGV       |
| Streptomyces_exfoliatus_WP_024761592.1     | : TAIIVGAGIS | LHLALRLOQAGV       |
| Streptomyces_sp._Root43l_WP_056642759.1    | : TAIIVGAGIS | LHLALRLOQAGV       |
| Streptomyces_venezuelae_WP_150272882.1     | : TAIIVGAGIS | LHLALRLOQAGV       |
| Streptomyces_gardneri_WP_141293187.1       | : TAIIVGAGIS | LHLALRLOQAGV       |
| Streptomyces_albus_WP_040245932.1          | : TAIIVGAGIS | LHLALRLOQAGV       |
| Streptomyces_sp._NBRC109706_WP_062205268.1 | : TAIIVGAGIS | LHLALRLOQAGV       |
| Kitasatospora_viridis_WP_145909623.1       | : TAIIVGAGIS | LHLALRLOQAGV       |
| Streptomyces_sp._LD120_WP_168541538.1      | : TAIIVGAGIS | LHLALRLOQAGV       |
|                                            |              | E                  |
| StStyA                                     | : VGIIVGSGIS | LHLALRLOQGV        |
| AaStyA                                     | : IGVIVGAGT  | LHLALRLOQLGVP      |
| SeStyA                                     | : IGIIVGSGIS | LHLALRLOQLGVP      |
| PbStyA                                     | : IGIIVGSGIS | LHLALRLOQLGVP      |
| Streptomyces_achromogenes_WP_030605949.1   | : IGVIVGSGIS | LHLALRLOQLGVP      |
| Streptomyces_sp._769_WP_052286622.1        | : VGIIVGSGIS | LHLALRLOQLGVP      |
| Nocardia_altamirensis_WP_069162359.1       | : IGIIVGSGIS | LHLALRLOQLGVP      |
| Kutzneria_sp._744_WP_043716969.1           | : IGVIVGSGIS | LHLALRLOQLGVP      |
| Nocardia_alba_WP_067452867.1               | : IGIIVGSGIS | LHLALRLOQLGVP      |

Group I

Group II

Group III

Group IV

Figure S2. Sequence alignment of Groups I to IV SMOs at position 46.

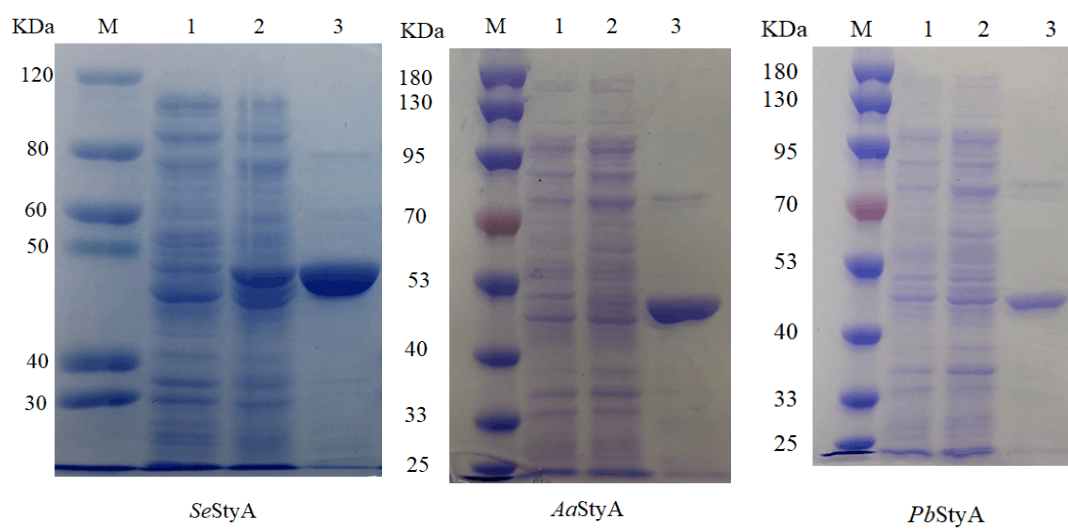

**Figure S3. SDS-PAGE analysis of *SeStyA*, *AaStyA* and *PbStyA*.**

M: Protein Marker; lane 1: cell-free extract of pET28a(+); lane 2: cell-free extract of StyA; lane 3: purified StyA.

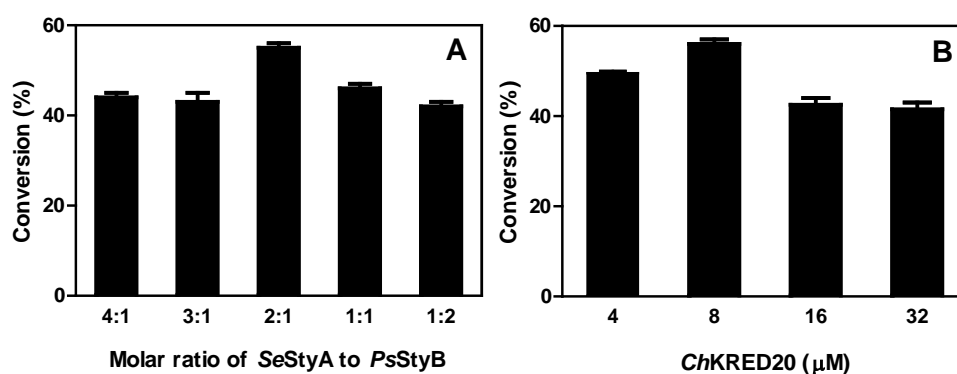

**Figure S4. Optimizing reaction conditions for kinetic analysis.**

A) The reaction mixture contained 5-40  $\mu\text{M}$  of purified *StStyA*, 10  $\mu\text{M}$  of purified *PsStyB*, 0.5 mM NADH, 50  $\mu\text{M}$  FAD and 650 U catalase B) The reaction mixture contained 20  $\mu\text{M}$  of purified *StStyA*, 10  $\mu\text{M}$  of purified *PsStyB*, 4-32  $\mu\text{M}$  of purified *ChKRED20*, 0.1 mM  $\text{NAD}^+$ , 50  $\mu\text{M}$  FAD and 650 U catalase.

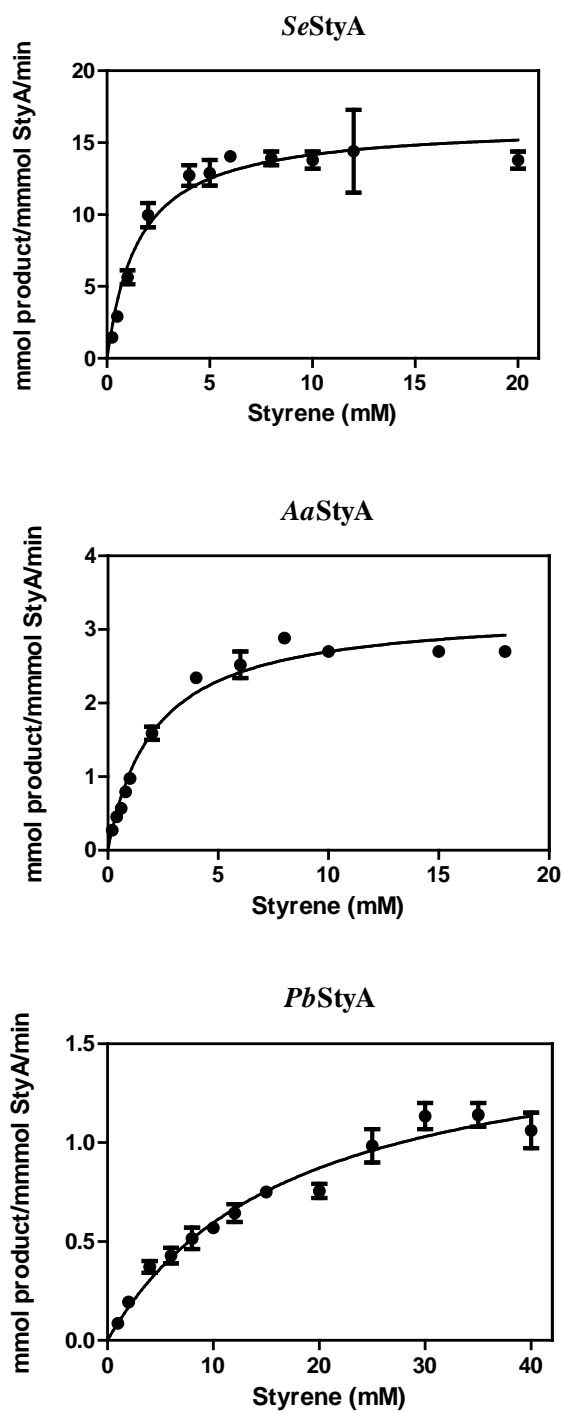

Figure S5. Steady-state kinetics of StyAs in the epoxidation of styrene.

# $^1\text{H}$ NMR spectra and HPLC chromatograms

## (*R*)-Styrene epoxide (**1b**)

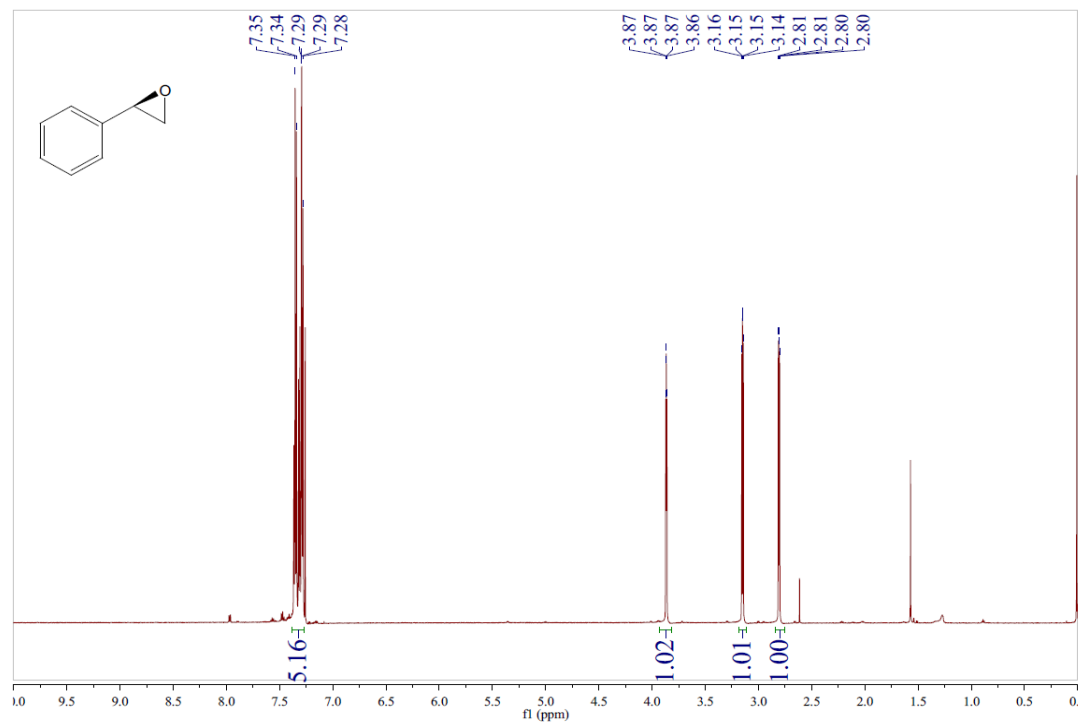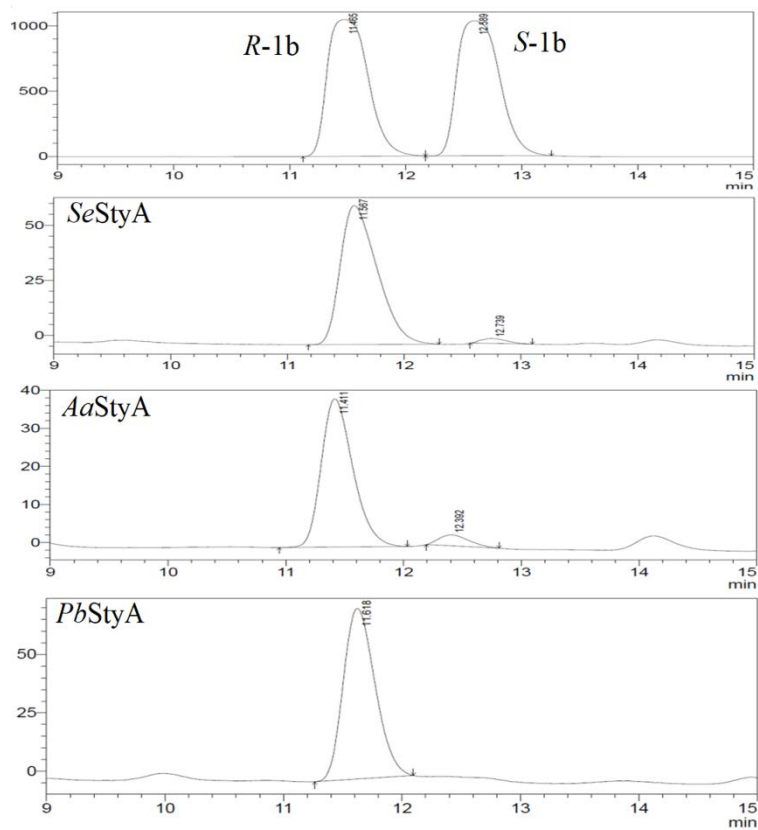

Chiralpak IC-H, *n*-Hexane: 2-propanol 98: 2, 0.5 mL/min

**(R)-2-(2-bromophenyl)oxirane (2b)**

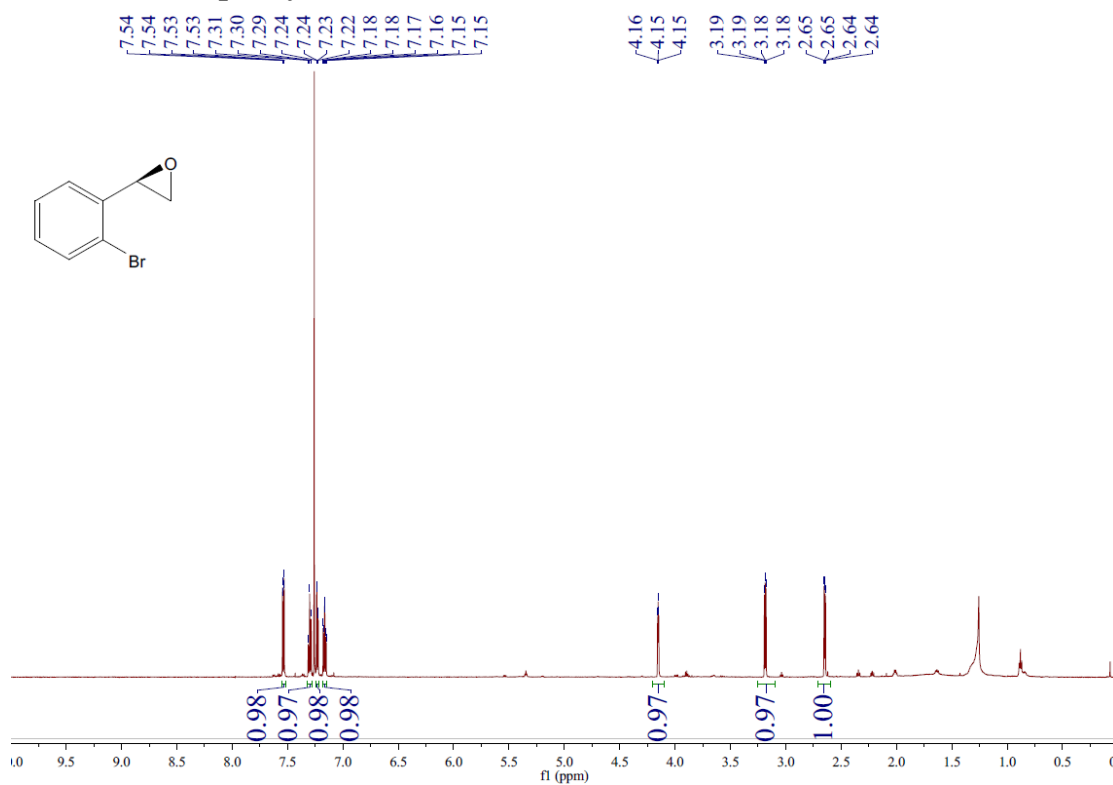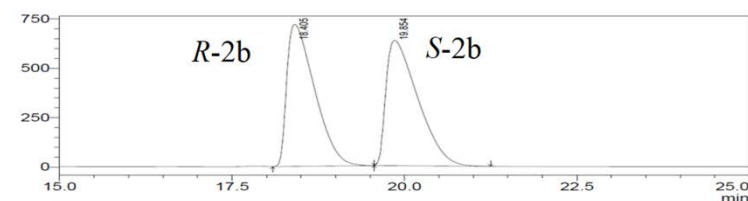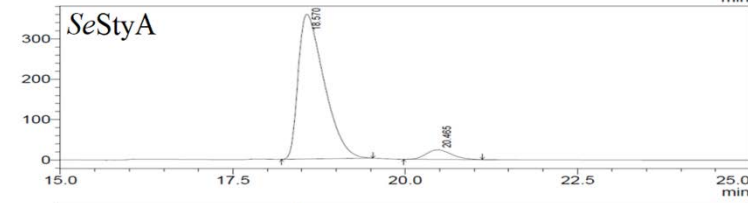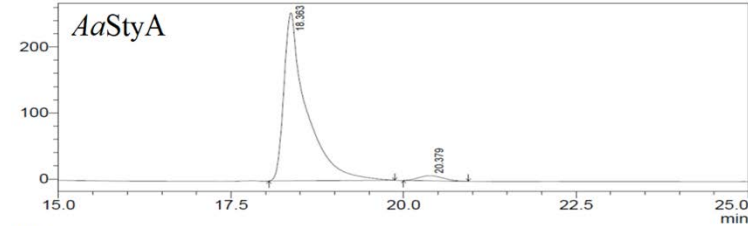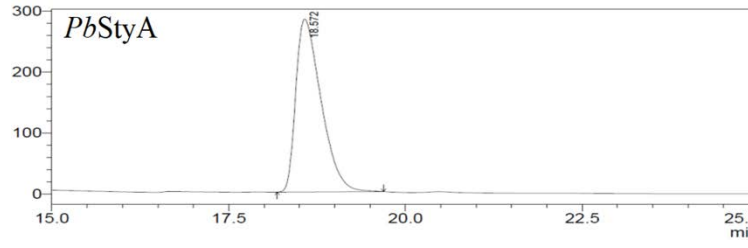

Chiralpak AS-H, *n*-Hexane: 2-propanol 90: 10, 0.5 mL/min

**(R)-2-(3-bromophenyl)oxirane (3b)**

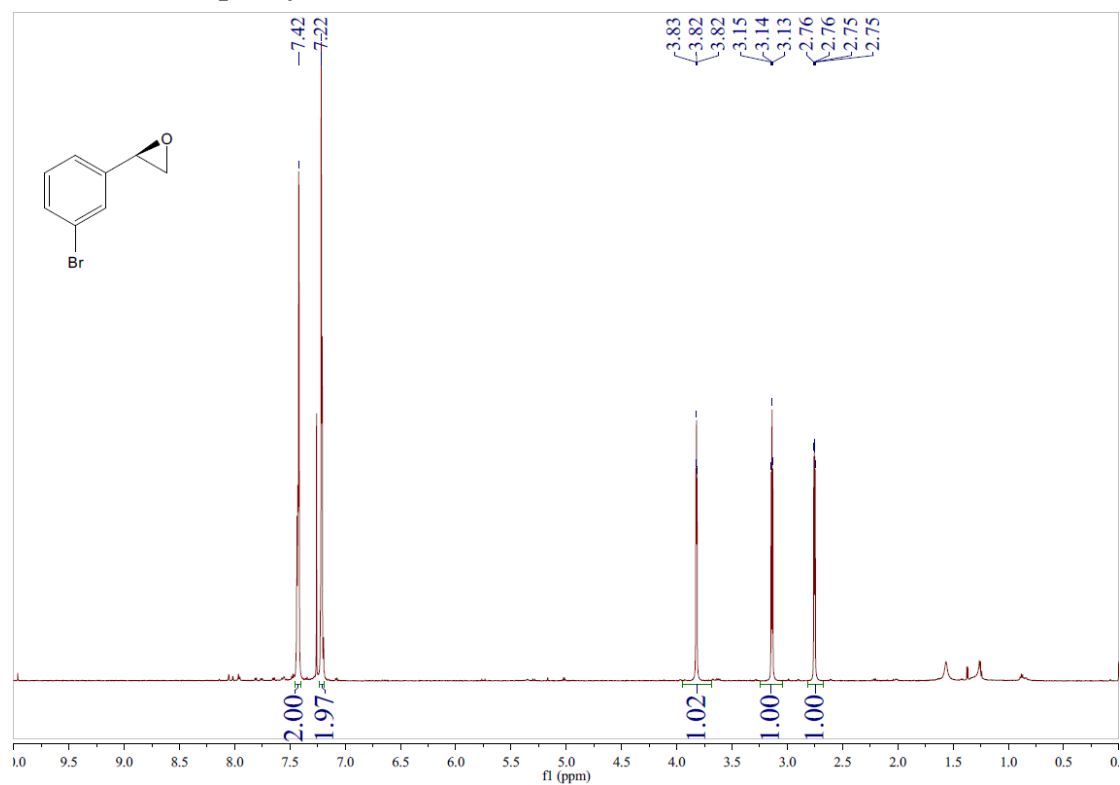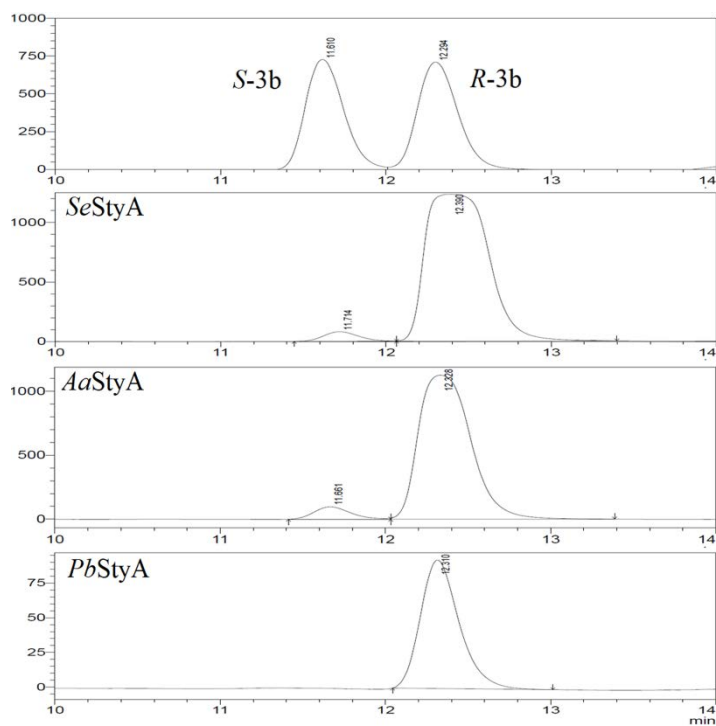

Chiralpak AD-H, *n*-hexane: 2-propanol 98: 2, 0.5 mL/min

**(S)-2-(4-bromophenyl)oxirane (4b)**

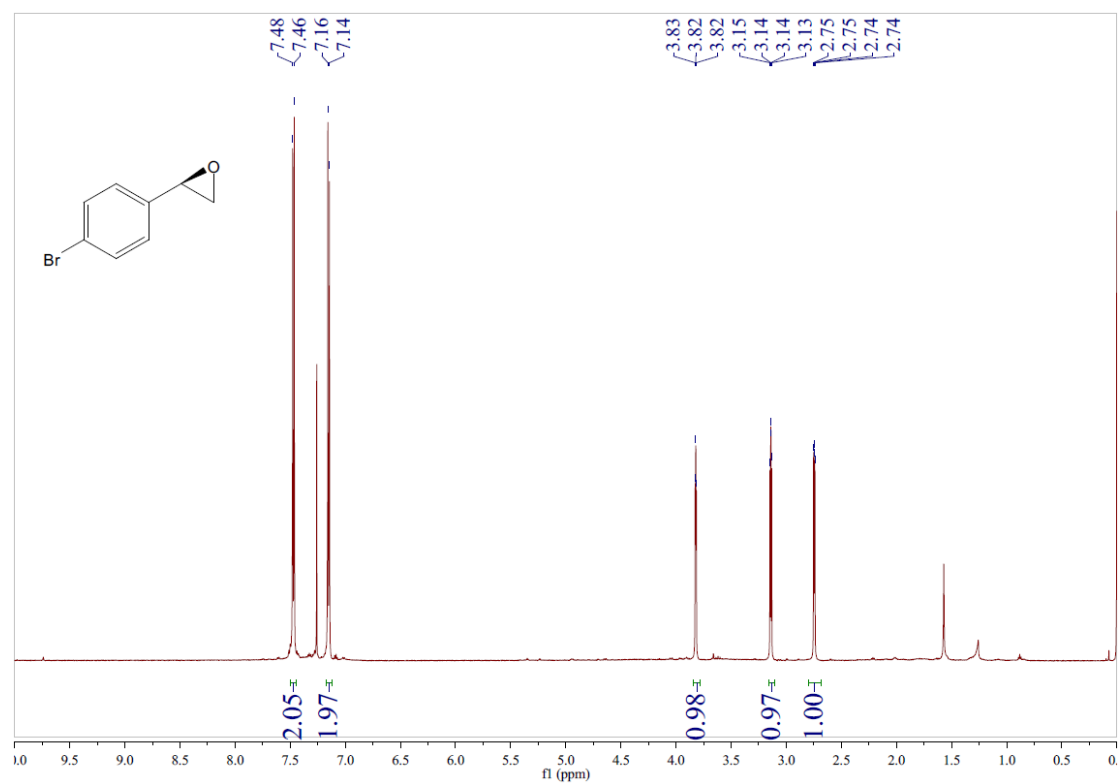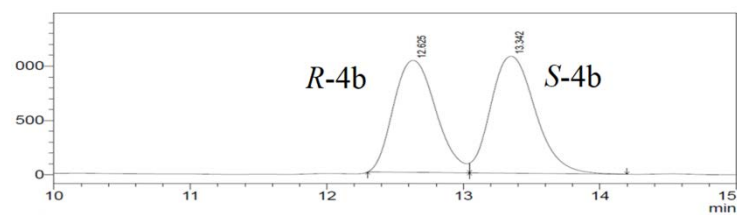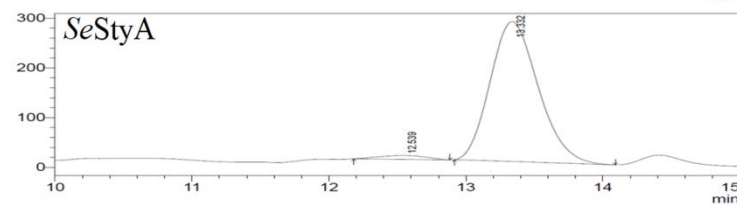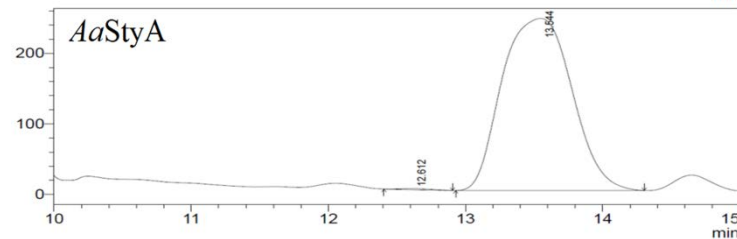

Chiralpak AD-H, *n*-hexane: 2-propanol 99: 1, 0.5 mL/min



**(R)-2-(2-Chlorophenyl)oxirane (5b)**

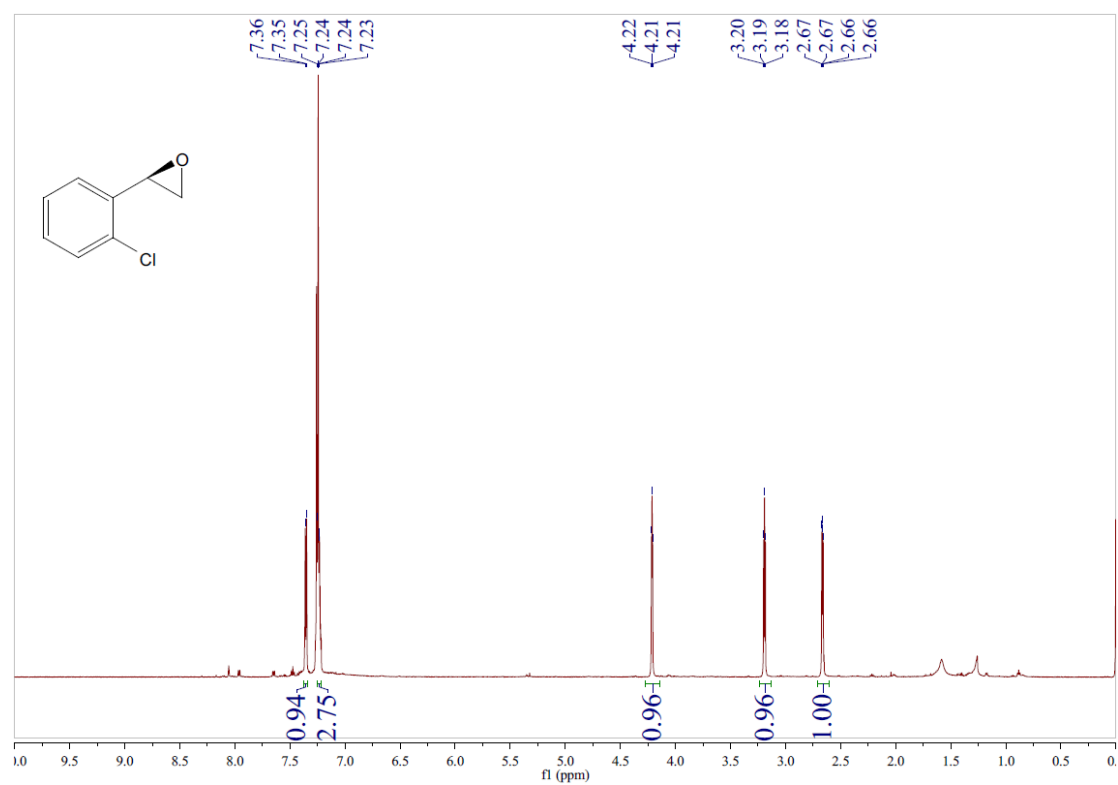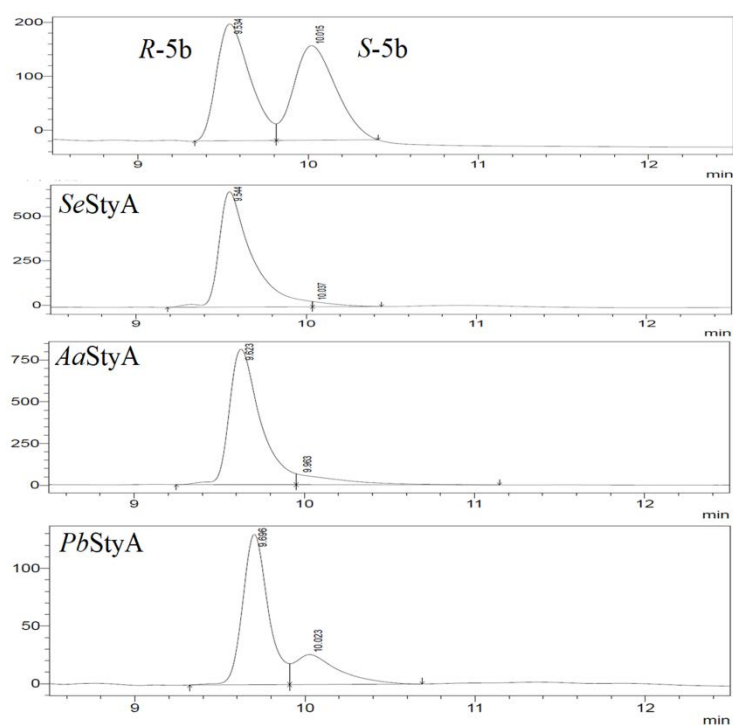

Chiralpak IC-H, *n*-hexane: 2-propanol 99: 1, 0.5 mL/min

**(R)-2-(3-Chlorophenyl)oxirane (6b)**

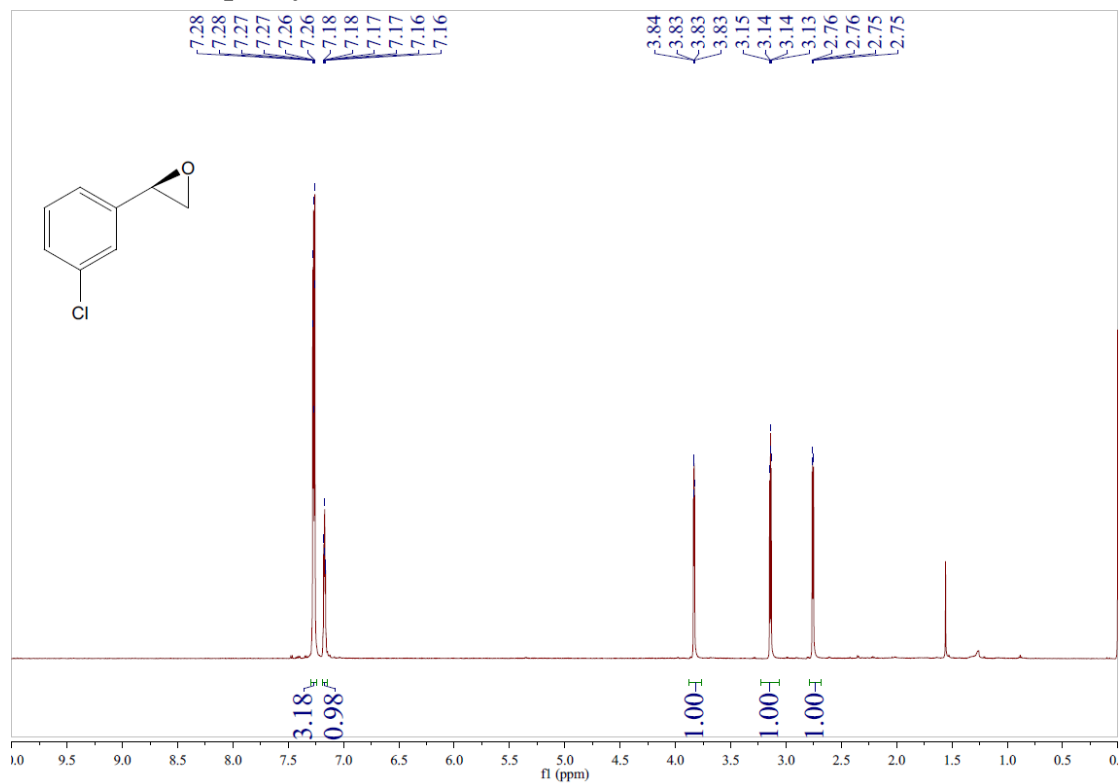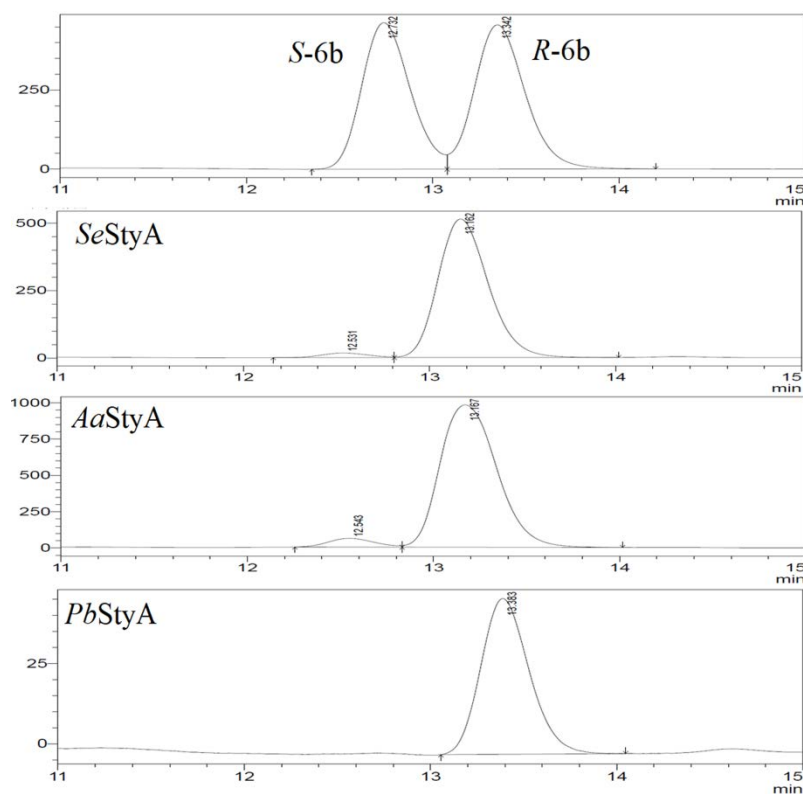

Chiralpak AD-H, *n*-hexane: 2-propanol 99: 1, 0.5 mL/min

**(S)-2-(4-Chlorophenyl)oxirane (7b)**

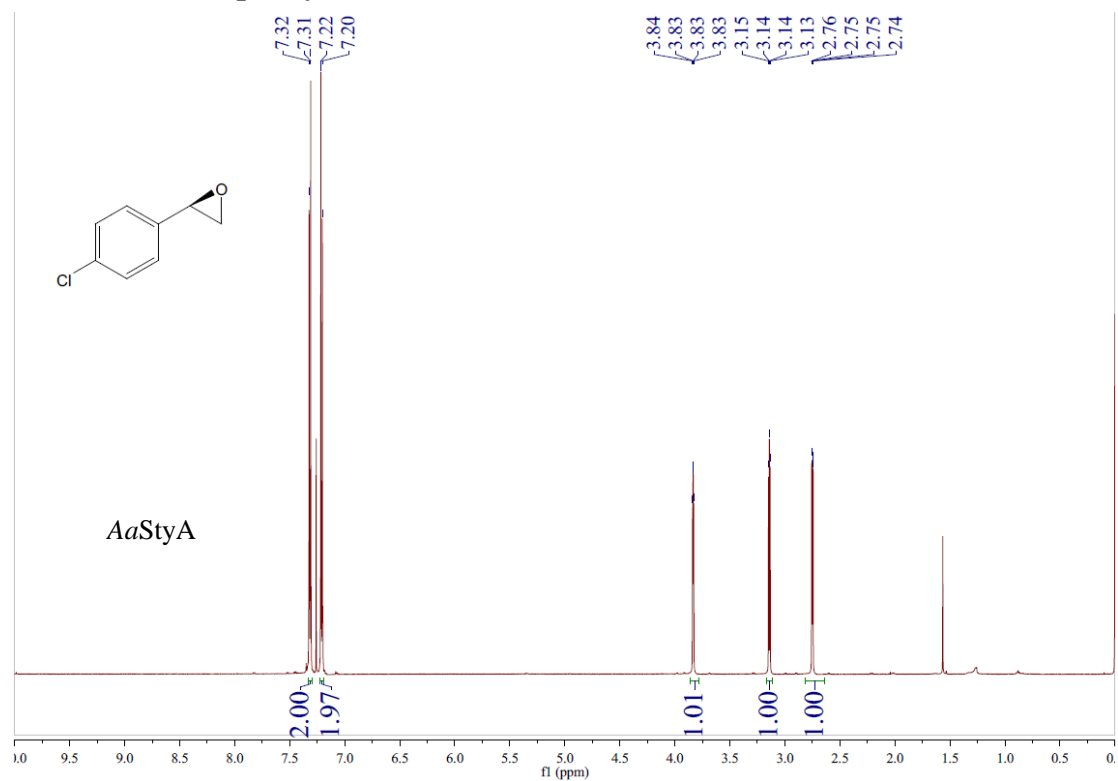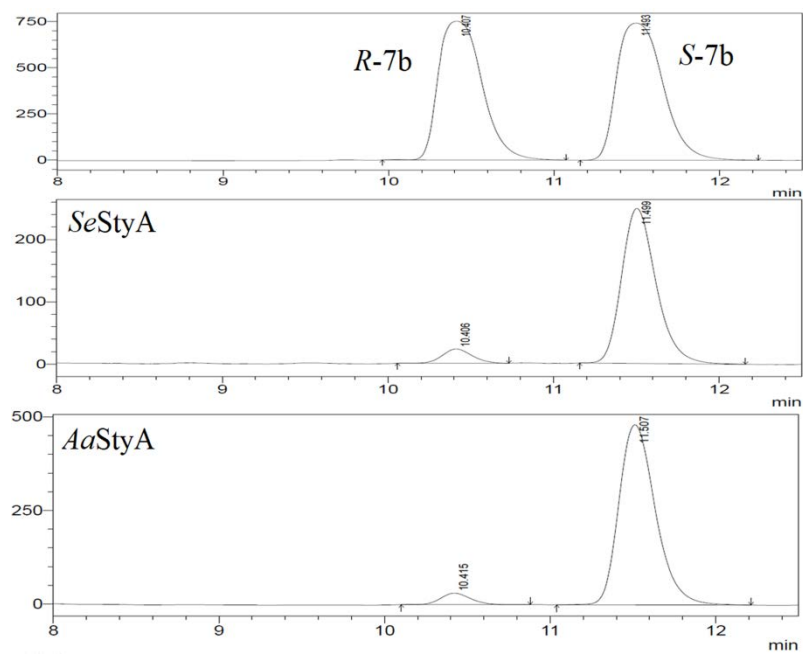

Chiralpak AS-H, *n*-hexane: 2-propanol 90: 10, 0.5 mL/min

**(R)-2-(2-tolyl)oxirane (8b)**

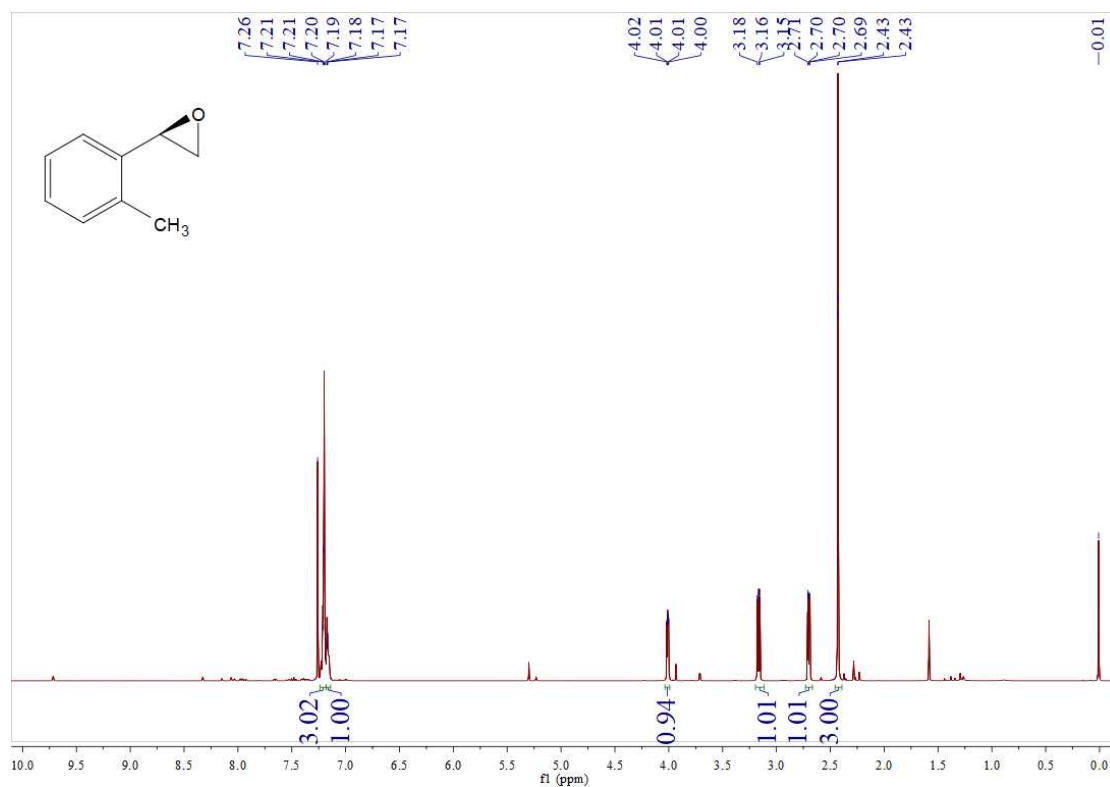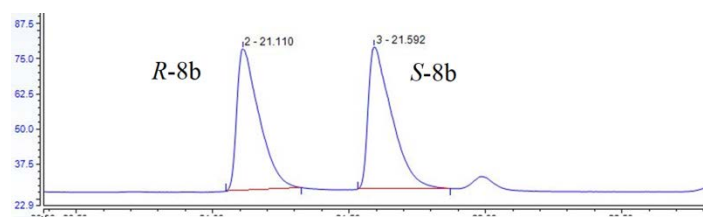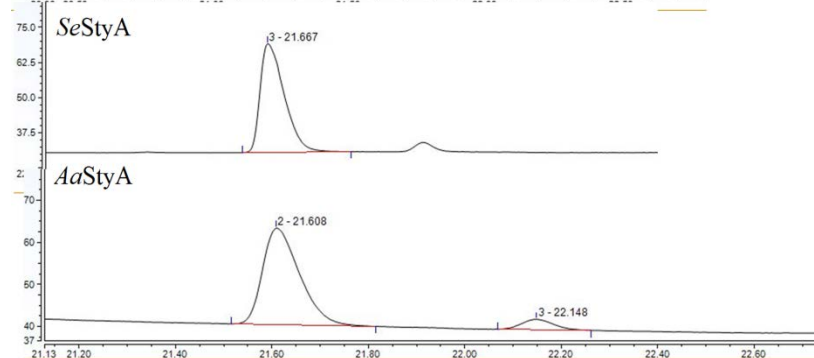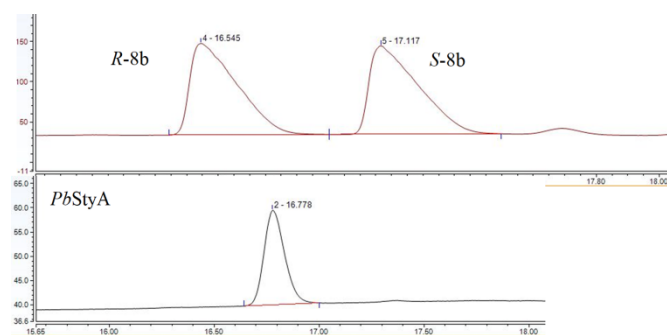

Chiral GC, CHIRASIL-DEX CB column

**(R)-2-(3-tolyl)oxirane (9b)**

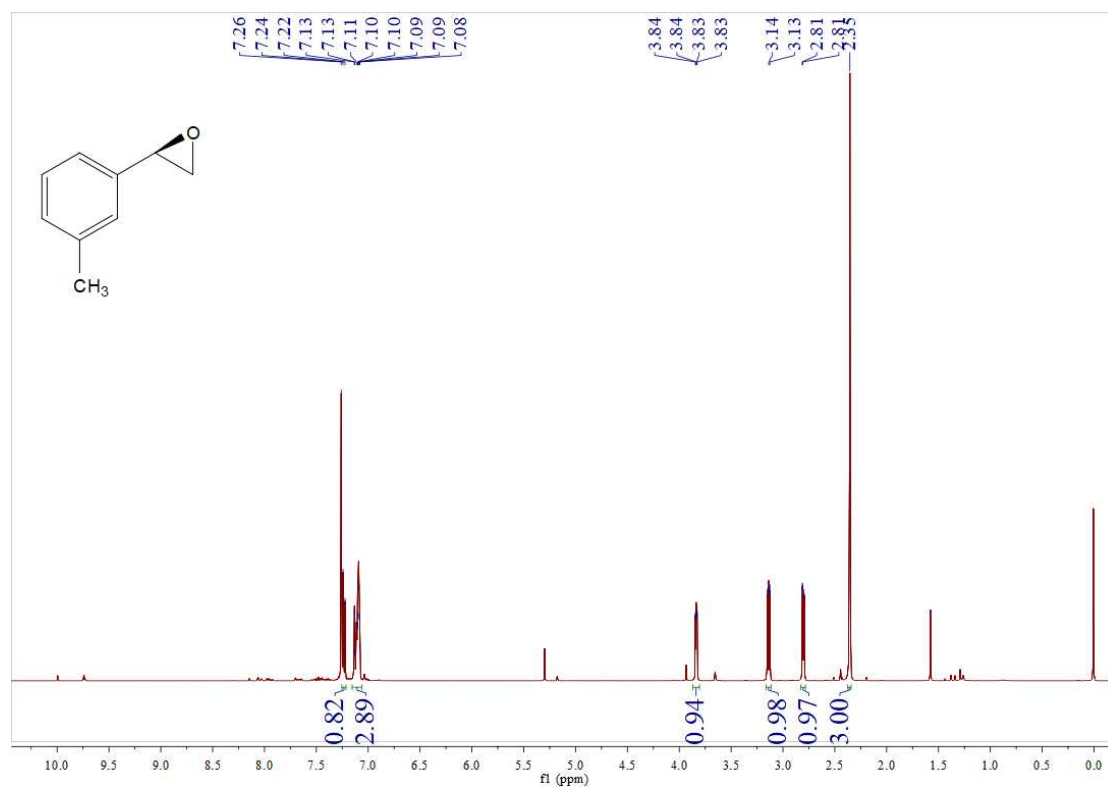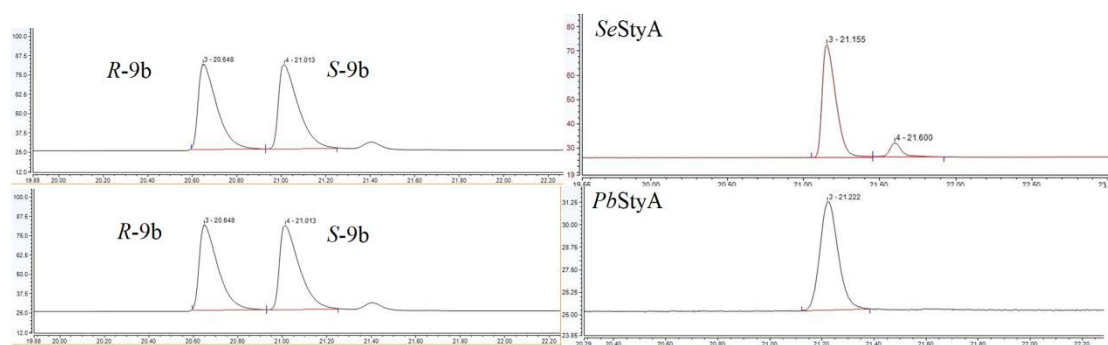

**Chiral GC, CHIRASIL-DEX CB column**

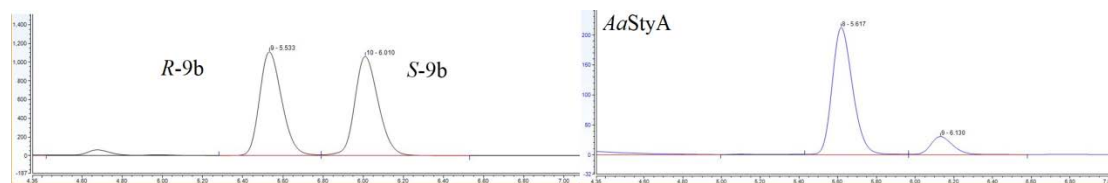

**Chiralpak AS-H, *n*-hexane: 2-propanol 99: 1, 1 mL/min**

**(S)-2-(4-tolyl)oxirane (10b)**

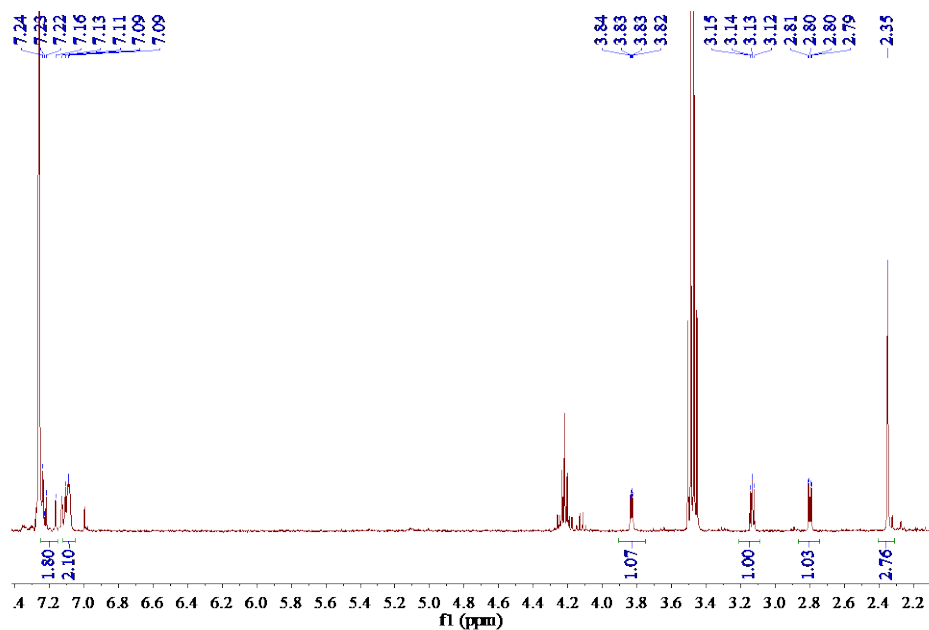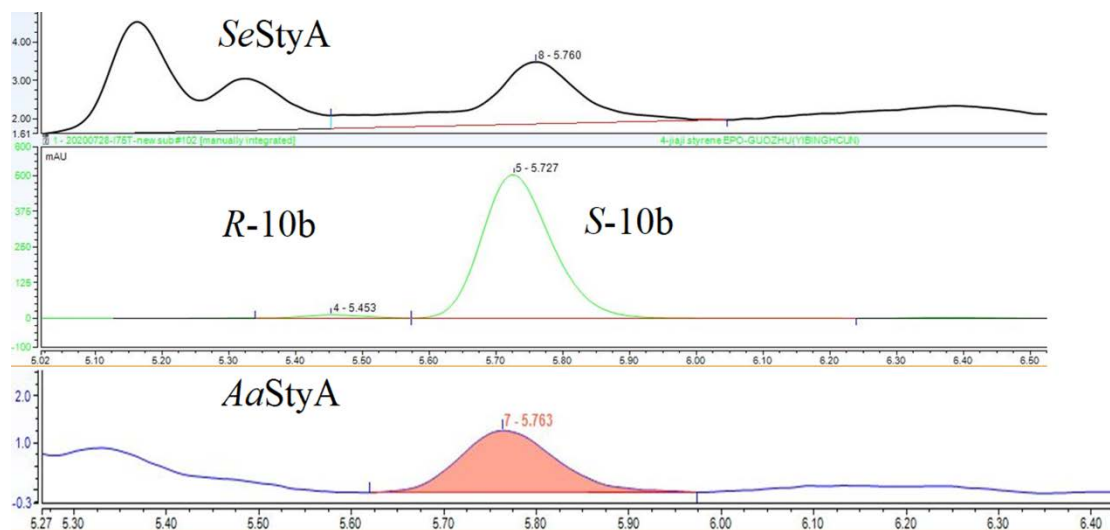

Chiralpak AS-H, *n*-hexane: 2-propanol 90: 10, 1 mL/min

**(R)-2-(3-methoxyphenyl)oxirane (11b)**

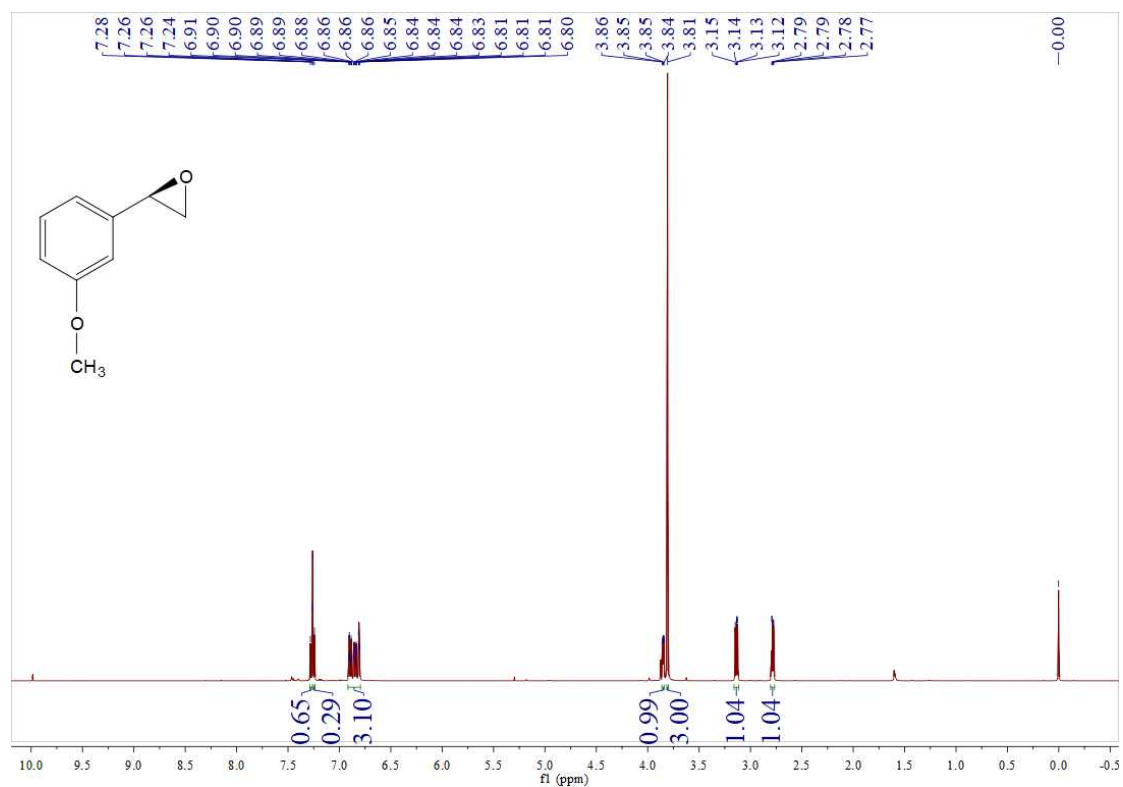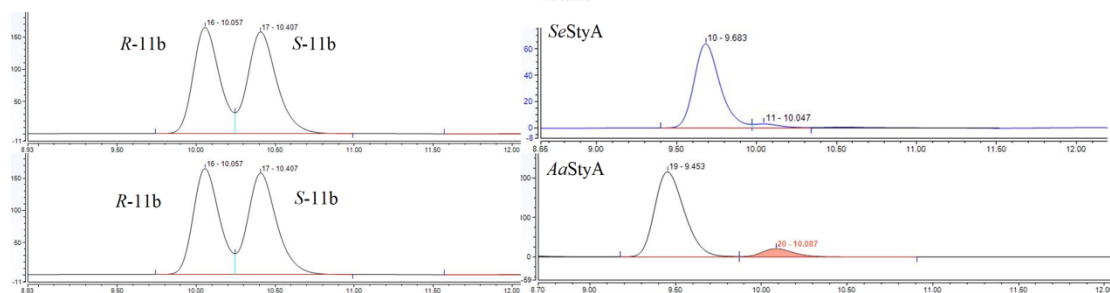

Chiralpak AS-H, *n*-hexane: 2-propanol 99: 1, 1 mL/min;

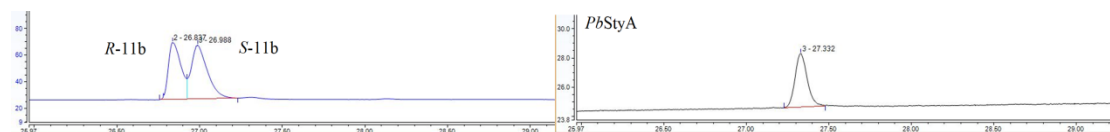

Chiral GC, CHIRASIL-DEX CB column

**(1*R*,2*S*)-1,2-dihydronaphthalene oxide (13b)**

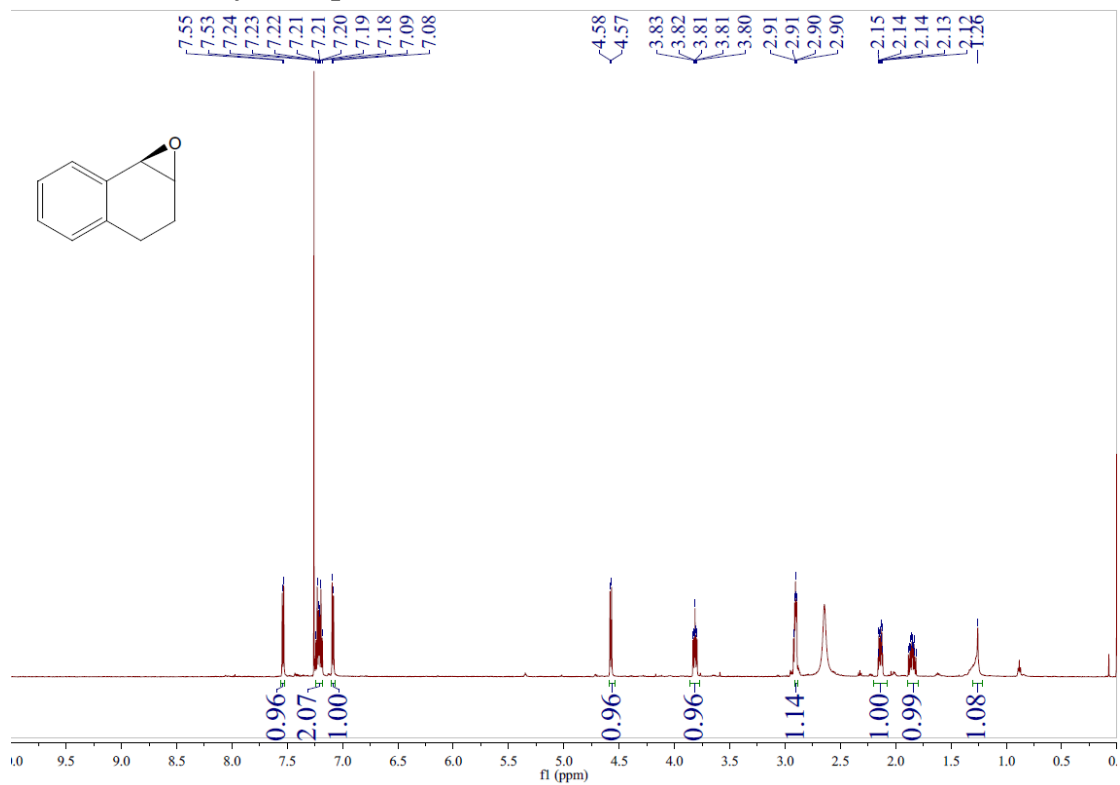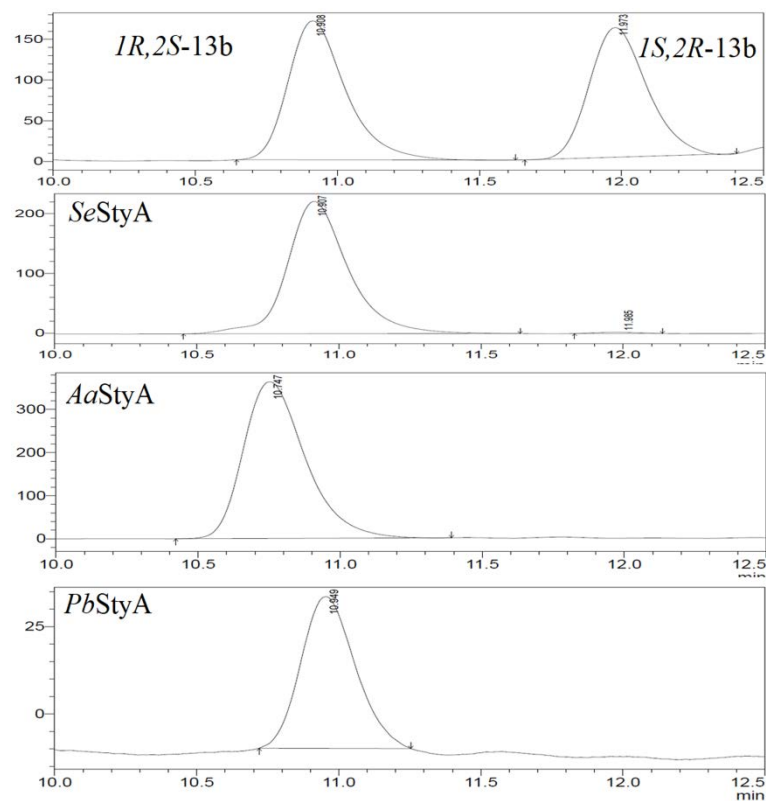

Chiralpak AS-H, *n*-hexane: 2-propanol 90: 10, 0.5 mL/min



1. H. Lin, J. Qiao, Y. Liu and Z.-L. Wu, *Journal of Molecular Catalysis B: Enzymatic*, 2010, **67**, 236-241.
2. J. B. Park, B. Bühler, T. Habicher, B. Hauer, S. Panke, B. Witholt and A. Schmid, *Biotechnol. Bioeng.*, 2006.
3. M. H. Eppink, W. J. V. Berkel and H. A. Schreuder, *Protein Sci.*, 1997, **6**, 2454-2458.
4. U. E. Ukaegbu, A. Kantz, M. Beaton, G. T. Gassner and A. C. Rosenzweig, *Biochemistry*, 2010, **49**, 1678-1688.
